# Supplementary material
Source: publisher site journal article supplement (https://www.dovepress.com/article/550592)
Supplement: Supplementary file 1 [file 550592%20%20Supplementary%20Material_1.docx]

**Clinical Trial Report**

Improving Sleep and Daytime Function with Tryptophan, Magnesium, Melissa and Lactuca formulation: An Exploratory Study in Adults with Sleep Disturbances

SUPPLEMENTARY

SUPPLEMENTARY Section A

### Complete list of inclusion/exclusion criteria

### Inclusion criteria

- Voluntary, written, informed consent to participate in the study.
- Male or female aged between 18-65 years (inclusive).
- Self reported sleep difficulties at a precursor of the criteria of the german “S3 guideline non-restorative sleep/sleep disorders - insomnia in adults” for the definition of non-organic insomnia according to ICD-10 (F 51.0).
- Habitual bedtime between 9 pm and midnight.
- Agreement to avoid foods such as pitted fruit, bananas, and chocolate 24 hrs before saliva sample collection.
- Willing to download wearable app, easy access to internet for the e-diary, cooling capacities available for storage of saliva samples.

### Exclusion criteria

- BMI <18.0 or >30.0 kg/m2.
- Women who were currently pregnant or breastfeeding.
- Any known history of a disorder affecting sleep quality, such as narcolepsy, obstructive sleep apnea (OSA), restless leg syndrome (RLS), periodic limb movement syndrome (PLMS) or any organic caused sleep disorders e.g. benign prostatic hyperplasia (BPH), urinary tract infections, irritated bladder, or any psychiatric disorder, e.g. depression, anxiety.
- Had a significant acute or chronic coexisting illness or any condition which contraindicates entry to the study in the opinion of the Investigator (e.g. migraines, active infections, renal insufficiency, hepatopathy).
- Previous (last 4 weeks prior to screening) or current intake of drugs that could influence sleep patterns including hormone therapy, health products and oriental herbs.
- Self-declared illicit drug use (including cannabis and cocaine) for 3 months prior to screening and during the intervention period.
- Binge drinking (males >140 g/week, females >70 g/week), heavy smoking (>10 cigarettes/day), high caffeine intake (>10 glasses/day).
- Had a high blood pressure (systolic over 159 mmHg or diastolic over 99 mmHg).
- Had learning and/or behavioural difficulties such as dyslexia or attention deficit hyperactivity disorder (ADHD).
- Had a visual impairment that cannot be corrected with glasses or contact lenses (including colour-blindness).
- History or planned travel to a different time zone within 1 month of the first visit or/and during the study participation.
- Shift worker.
- Not fluent in German.
- Pensioner.
- Had relevant food allergies/ intolerances/ sensitivities to any substance in the study product.
- Had oral disease.
- Participation in another study with any investigational product within 30 days of screening and during the intervention period.
- Investigator believed that the participant may be uncooperative and/or noncompliant and should therefore not participate in the study.

Table S1. Overview of SF-B/R Sleep Quality Subscale Scores

|  | **Baseline**  **(V2)** | | | **14 days intervention (V3)** | | |  | |  |  |  |
| --- | --- | --- | --- | --- | --- | --- | --- | --- | --- | --- | --- |
|  | **Mean** | **SD** | **SEM** | **Mean** | **SD** | **SEM** | | **N** | **%-change** | **p** | d |
| Difficulty falling asleep (ESS) | 3.22 | 0.39 | 0.06 | 3.09 | 0.44 | 0.06 | | 50 | -4.0 | **0.020** | 0.354 |
| Difficulty sleeping through the night (DSS) | 3.34 | 0.68 | 0.10 | 3.03 | 0.79 | 0.11 | | 50 | -9.3 | **0.003** | 0.454 |
| Wake up before time (VZA) | 2.96 | 0.97 | 0.14 | 2.50 | 0.89 | 0.13 | | 50 | -15.5 | **< 0.001** | 0.571 |
| Delineated night sleep (ASC) | 2.87 | 0.50 | 0.07 | 3.27 | 0.58 | 0.08 | | 50 | 13.9 | **< 0.001** | -0.946 |
| Total sleep time (GSD) | 8.14 | 1.00 | 0.14 | 8.07 | 0.90 | 0.13 | | 50 | -0.9 | 0.664 | 0.065 |
| Feeling refreshed after sleep (GES) | 2.75 | 0.65 | 0.09 | 2.94 | 0.64 | 0.09 | | 50 | 6.9 | **< 0.001** | -0.679 |
| Well-being before sleep (PSYA) | 3.40 | 0.57 | 0.08 | 3.59 | 0.52 | 0.07 | | 50 | 5.6 | **0.010** | -0.401 |
| Feeling exhausted before sleep (PSYE) | 3.35 | 0.43 | 0.06 | 3.21 | 0.39 | 0.06 | | 50 | -4.2 | 0.204 | 0.190 |
| Psychosomatic symptoms (PSS) | 1.70 | 0.40 | 0.06 | 1.43 | 0.31 | 0.04 | | 50 | -15.9 | **< 0.001** | 0.858 |
| Dream recall (TRME) | 2.33 | 0.91 | 0.13 | 2.27 | 0.85 | 0.12 | | 50 | -2.6 | 0.789 | 0.040 |
| Sleep-wake-pattern (SWR) | 2.23 | 0.28 | 0.04 | 2.21 | 0.28 | 0.04 | | 50 | -0.9 | 0.498 | 0.102 |

SD: standard deviation, SEM: Standard deviation of the mean, N= 50 subjects, d= Cohen’s d “effect size”

Table S2. Sleep quality assessments as per the electronic sleep diary.

| **Online Sleep Diary** | **Day** | Mean | SD | SEM | N | %-change | p | d |
| --- | --- | --- | --- | --- | --- | --- | --- | --- |
| Physical tension |  |  |  |  |  |  |  |  |
| baseline | 0 | 4.12 | 1.42 | 0.2 | 50 |  |  |  |
| week 1 | 7 | 3.2 | 1.3 | 0.18 | 50 | -22.33 | <0.001 | 0.619 |
| week 2 | 14 | 2.82 | 1.29 | 0.18 | 50 | -31.55 | <0.001 | 0.823 |
| Psychological tension |  |  |  |  |  |  |  |  |
| baseline | 0 | 4.15 | 1.7 | 0.24 | 50 |  |  |  |
| week 1 | 7 | 3.28 | 1.34 | 0.19 | 50 | -20.96 | <0.001 | 0.509 |
| week 2 | 14 | 2.94 | 1.38 | 0.2 | 50 | -29.16 | <0.001 | 0.68 |
| Sleep enjoyment |  |  |  |  |  |  |  |  |
| baseline | 0 | 4.69 | 1.38 | 0.2 | 50 |  |  |  |
| week 1 | 7 | 5.52 | 1.19 | 0.17 |  | 17.697 | <0.001 | -0.534 |
| week 2 | 14 | 5.75 | 1.36 | 0.19 |  | 22.601 | <0.001 | -0.628 |
| Feeling rested |  |  |  |  |  |  |  |  |
| baseline | 0 | 4.32 | 1.31 | 0.19 | 50 |  |  |  |
| week 1 | 7 | 5.26 | 1.37 | 0.19 |  | 21.759 | <0.001 | -0.773 |
| week 2 | 14 | 5.55 | 1.32 | 0.19 |  | 28.472 | <0.001 | -0.818 |

%-change indicate relative %change to baseline, all variables were tested using t-test with an alpha level =0.05, d= Cohen’s effect size d., SD = standard deviation, SEM = Standard Error of the Mean

Table S3: SF-B/R scales – %-change from V2 to V3 with regard to trait anxiety subgroups

|  |  | SQ | ESS | DSS | VZA | ASC | GSD | GES | PSYA | PSYE | PSS | TRME | SWR |
| --- | --- | --- | --- | --- | --- | --- | --- | --- | --- | --- | --- | --- | --- |
| low anxiety | |  |  |  |  |  |  |  |  |  |  |  |  |
| Mean |  | 13.13 | 0.65 | -4.24 | -9.00 | 13.42 | -0.36 | 10.36 | 7.11 | -3.91 | -13.67 | 2.93 | 1.43 |
| SD |  | 48.43 | 14.86 | 21.19 | 24.52 | 14.59 | 8.60 | 18.65 | 19.59 | 12.93 | 16.11 | 27.99 | 10.75 |
| SEM |  | 9.69 | 2.97 | 4.24 | 4.90 | 2.92 | 1.72 | 3.73 | 3.92 | 2.59 | 3.22 | 5.60 | 2.15 |
| 95% CI | LB | -6.86 | -5.48 | -12.99 | -19.12 | 7.40 | -3.91 | 2.66 | -0.97 | -9.25 | -20.32 | -8.62 | -3.01 |
|  | UB | 33.12 | 6.78 | 4.50 | 1.12 | 19.45 | 3.19 | 18.06 | 15.20 | 1.43 | -7.02 | 14.49 | 5.86 |
| N |  | 25 | 25 | 25 | 25 | 25 | 25 | 25 | 25 | 25 | 25 | 25 | 25 |
| high anxiety | |  |  |  |  |  |  |  |  |  |  |  |  |
| Mean |  | 37.18 | -6.71 | -12.08 | -9.27 | 17.13 | -0.15 | 14.79 | 8.40 | -2.18 | -14.40 | -0.42 | -1.33 |
| SD |  | 54.53 | 15.48 | 19.72 | 54.52 | 18.16 | 12.21 | 17.65 | 19.00 | 15.42 | 19.00 | 28.18 | 13.13 |
| SEM |  | 10.91 | 3.10 | 3.94 | 10.90 | 3.63 | 2.44 | 3.53 | 3.80 | 3.08 | 3.80 | 5.64 | 2.63 |
| 95% CI | LB | 14.67 | -13.10 | -20.22 | -31.77 | 9.63 | -5.18 | 7.51 | 0.56 | -8.54 | -22.24 | -12.05 | -6.75 |
|  | UB | 59.69 | -0.32 | -3.94 | 13.24 | 24.63 | 4.89 | 22.08 | 16.24 | 4.19 | -6.56 | 11.21 | 4.09 |
| N |  | 25 | 25 | 25 | 25 | 25 | 25 | 25 | 25 | 25 | 25 | 25 | 25 |

*SD = standard deviation, SEM= standard error of mean, 95% CI LB & UB = 95% confidence interval, lower bound and upper bound, N = sample size, ESS = Difficulty falling asleep, DSS = Difficulty Sleeping Through The Night, VZA = Wake Up Before Time, ASC = Delineated Night Sleep, GSD = Total Sleep Time, GES = Feeling Refreshed After Sleep, PSYA = Well-Being Before Sleep, PSYE = Feeling Exhausted Before Sleep, PSS = Psychosomatic Symptoms Experienced During Sleep, TRME = Dream Recall SWR = Sleep-Wake Pattern*

SUPPLEMENTARY Section B

# COMPASS battery & Visual Analogue Scales

### Cognitive functions using COMPASS

All cognitive function tests will be delivered using the Computerized Mental Performance Assessment System (COMPASS). This testing system delivers a collection of tasks, with fully randomized parallel versions of each task at each assessment for each individual.

A first COMPASS test will be performed once at V1 to familiarize the participants with the system. These results will not be considered in the analysis except of the Visual Analogue Scales to assess mood. At V2 and V3 study participants will perform the COMPASS once pre and once post the acute intake, respectively.

All subtests, tasks and outcomes are described below:

**Visual Analog Mood Scales (VAMS)**

Each VAMS is a line anchored at either side by an adjective describing a specific mood. Participants must click at a point on the scale that represents how they are feeling at that point in time. There are 18 scales in total. Scores are calculated as percentage along the line from left to right. In this study, the mood adjectives were translated into German.

From the 18 scales three overall composite scores are calculated describing feelings of ‘Alertness’, ‘Stress’ and ‘Tranquility’, which are also presented as a score out of 100. These are calculated as follows:

**Alertness:**

This total score is calculated by using the following 11 VAMS scores:

- Alert x Inattentive (R)
- Lethargic x Energetic
- Clumsy x Coordinated
- Lively x Sluggish (R)
- Quick-witted x Slowwitted (R)
- Sharp x Dull (R)
- Exhausted x Refreshed
- Bored x Engaged
- Focused x Unfocused (R)
- Drowsy x Awake
- Motivated x Unmotivated (R)

6 VAMS (marked with the ‘R’) have to be scored in reverse by the following formula: 100 minus the ticked value. Afterwards, all 11 values will be summed up (by using the reversed numbers for the 6 values above) and the total sum is divided by 11. Higher scores denote higher alertness.

**Stress:**

This total score is calculated by using the following 4 VAMS scores:

- Tense x Relaxed (R)
- Fearful x Fearless (R)
- Stressed x Carefree (R)
- Peaceful x Troubled

3 VAMS (marked with the ‘R’) have to be scored in reverse by the following formula: 100 minus the ticked value. Afterwards, all 4 values will be summed up (by using the reversed numbers for the 3 values above) and the total sum is divided by 4. Higher scores denote higher stress.

**Tranquility:**

This total score is calculated by using the following 3 VAMS scores:

- Tranquil x Agitated (R)
- Contented x Discontented (R)
- Friendly x Hostile (R)

All 3 VAMS have to be scored in reverse by the following formula: 100 minus the ticked value. Afterwards, all 3 values will be summed up (by using the reversed) and the total sum is divided by 3. Higher scores denote higher tranquility.

**Word Presentation / Immediate and Delayed Word Recall / Delayed Word Recognition**

A list of 15 words is displayed on the screen, one word at a time for 1 sec. with an interstimulus interval of 1 sec. Participants are asked to memorize as many words as possible. Since COMPASS only provides English word lists, German word lists are used in this study.

Task ‘immediate and delayed word recall’: In the course of the test Participants are given 60 seconds to write down as many of the words they were shown earlier in the word presentation task as possible. This will be asked twice - once soon after the presentation (immediate word recall) and once after a delay (delayed word recall).

Outcome: Number of words written down correctly

Task ‘delayed word recognition’: All target words that were shown during Word Presentation task plus an equal number of distractor words will be displayed on the screen one at a time. Participants indicate if they remember seeing the word earlier or not.

Outcome: Overall accuracy [%]

**Picture Presentation / Delayed Picture Recognition**

A series of 15 pictures is displayed on the screen, one picture at a time for 2 sec. with an interstimulus interval of 1 sec. Participants are asked to memorize as many pictures in details as possible.

Task:All target pictures shown during Picture Presentation task plus an equal number of distractor pictures will be displayed on the screen, one at a time. For each stimulus participants indicate if they have seen the picture before or not.

Outcome: Overall accuracy [%]

**Face-Name Presentation / Delayed Name to Face Recall**

A series of 12 faces is displayed on the screen, one face at a time, with a forename and surname presented underneath. Each face and name are presented for 3 sec. with an interstimulus interval of 1 sec. The English forenames and surnames provided by COMPASS will be used.

Task: The target faces presented in the Face Presentation task are displayed on the screen one at a time. Below each face is a list of 4 forenames and a list of 4 surnames. Participants select the forename and surname that they think were shown with each face at the beginning of the session.

Outcome: Overall accuracy [%]

**Numeric Working Memory**

Three series of 5 random single digit numbers are displayed on the screen, one at a time. Participants are required to try to memorize these numbers as they appear. Once a series is complete, numbers of the series will be displayed one at a time and participants are required to indicate if each number was presented in the previous list or not.

Outcome: Overall accuracy [%]

**Choice Reaction Time**

Arrows pointing left and right will appear on the screen at irregular intervals. The participant is asked to indicate the direction of the arrow as quickly as possible, whenever an arrow is displayed. In total 50 stimuli are presented.

Outcome: Reaction Time in [msec]

**Corsi Blocks**

Nine blue squares on a black background are displayed on the screen. Some of the blue squares change to red and back to blue again in a sequence. Participants are asked to remember this sequence and use the cursor to click the blocks in the exact sequence in which they were presented. The level of difficulty increases with the number of blocks that change from blue to red, which the participants then have to remember in the correct order. The task is repeated five times at each level of difficulty with the sequence span increasing from 4 squares upwards, until the participant can no longer correctly recall the sequences. Corsi blocks continue up to fifteen levels (i.e. up to 15 squares in each sequence), as long as participants are making enough correct responses. As soon as they make less than 3 correct responses (out of the five in one level) the task will end.

Outcome: Span score: This score is calculated as the average of the last 3 correctly completed trials. For example, if the participant correctly responds to all five Level 4 trials and only one Level 5 trial, their span score would be 4.3 [(4 + 4 + 5)/3].

**Peg and Ball**

Two configurations will be shown on the screen: the goal configuration at the top of the screen and the starting configuration in the centre of the screen. In each screen three coloured balls (blue, green, red) will be presented on one of 3 pegs. Participants must arrange the balls on the starting configuration to match the position of balls in the goal configuration. They must do this in the least number of moves possible.

Outcome: Average completion time [msec]: Time span from the first pull of a ball to successful completion

**Cognitive Demand Battery**

In this study the cognitive demand battery consists of three consecutive sessions of the Serial 3 Subtractions, the Serial 7 Subtractions, the Rapid Visual Information Processing (RVIP) and a visual analog scale (VAS):

**Serial Subtractions**

A random starting number between 800 and 999 is displayed on the screen. At each subtraction task a different starting number is used. Participants are required to subtract either 3 or 7 from this and continue to subtract from the resultant numbers for the duration of the task. The Cognitive Demand Battery uses 2 minutes of Serial 3 subtractions followed by 2 minutes of Serial 7 subtractions.

Outcomes: Total: Total number of numbers entered

Correct: Number of correctly entered numbers

**Rapid Visual Information Processing (RVIP)**

A series of single digit numbers are displayed individually on the screen at a rate of 100 numbers per minute. Participants are asked to respond when they see 3 odd numbers in a row or three even numbers in a row (e.g., 1-5-7 or 2-4-8). This subtest has a duration of 5 min.

Outcome: Overall accuracy [%]

**Visual Analog Scale (VAS)**

As part of the Cognitive Demand Battery, this line scale measures the mental fatigue with the end points representing extremes “not at all mentally fatigued” on left side and “extremely mentally fatigued” on the right side. Participants must click at a point on the scale that represents how they are feeling at that time point. Scores are calculated as percentage along the line from left to right.

For analysis, mean values are calculated over all three consecutive repetitions of the serial subtraction, RVIP and VAS.

Endpoints related to cognitive measures:

- COMPASS outcomes include domains with cognitive tasks and corresponding task outcomes:
  - Mood: Visual Analog Mood Scales (VAMS) for alertness, stress, and tranquility
  - Secondary memory:
    - Immediate and Delayed Word Recall outcome number of correct responses
    - Delayed Word Recognition with task outcome overall accuracy [%]
    - Delayed Picture Recognition with task outcome overall accuracy [%]
    - Delayed Name to Face Recall with task outcome overall accuracy [%]
  - Working memory: Numeric Working Memory with task outcome overall accuracy [%], Corsi Blocks with task outcome span score
  - Attention and vigilance: Choice reaction time with task outcome reaction time in [msec], Rapid visual information processing (RVIP) with task outcome overall accuracy [%]
  - Spatial memory: Corsi Blocks with task outcome span score
  - Executive function: Peg and Ball with task outcome average completion time [msec], Serial subtractions with task outcome total number of numbers entered Correct: Number of correctly entered numbers
  - Cognitive demand battery:
    - Serial subtractions with task outcome total number of numbers entered Correct: Number of correctly entered numbers
    - Rapid visual information processing (RVIP) with task outcome overall accuracy [%]
    - Visual analog scales (VAS) with task outcome score [%] along the line from left to right


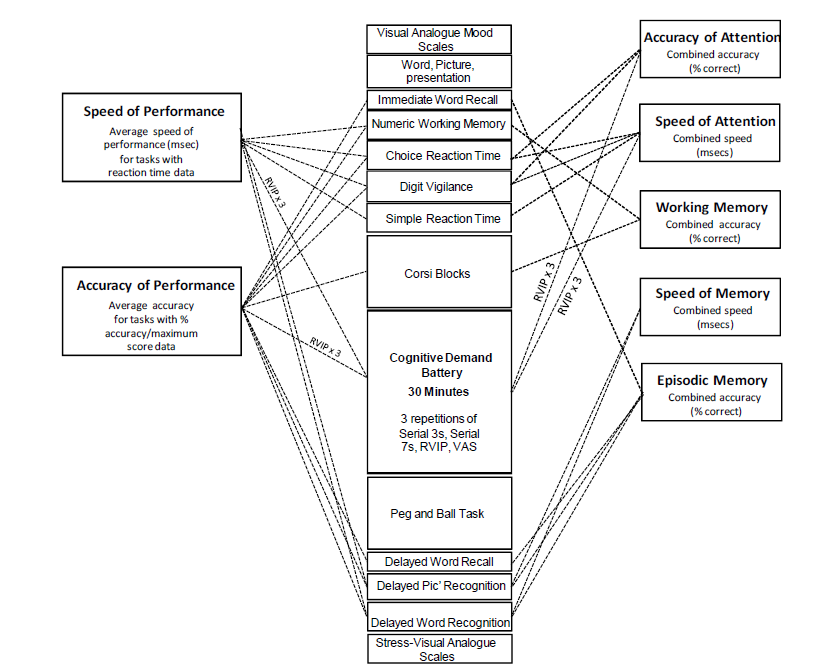


Figure S1: Cognitive assessments of the COMPASS battery.

For COMPASS parameters, efficacy was defined as higher levels of alertness, higher scores in immediate and delayed word recall as well as delayed word recognition, delayed picture recognition, delayed name to face recall, Corsi blocks, and cognitive demand battery at V3 as compared to V2.

Furthermore, efficacy in these parameters was defined as: higher scores after the intake at (1) V2 as well as (2) V3. Efficacy was also defined as (3) higher scores after the intake at V3 as compared to before the intake at V2.

For the COMPASS parameters stress, tranquility, peg and ball, and mental fatigue efficacy was defined as lower scores at V3 as compared to V2.

Furthermore, efficacy in these parameters was defined as: lower scores after as compared to before the intake at (1) V2 as well as (2) V3. Efficacy was also defined as (3) lower scores after the intake at V3 as compared to before the intake at V2.

Efficacy was evaluated using a t-test for dependent samples. Two-sided hypothesis testing (α =.05) was performed.

If assumptions for t-tests were not met, data were transformed using linear transformations such as logarithm or square root. If assumptions for performing a t-test were violated despite efforts of transformation, a Wilcoxon signed-rank test was performed instead.

# Individual COMPASS task outcomes

In the "peg and ball task," reaction time improved by 14.2%, decreasing from 9’604±296 ms at baseline to 8’237±249 ms after 14 days **(±SEM,** N=50, p<0.001). In the "serial subtraction task" total scores rose by 12.2% (29.8±1.4 to 33.4 ±1.6 points, p<0.001), and correct answers by 13.2% (27.5±1.4 to 31.2±1.6 points**,** p<0.001). Together, these tasks, targeting executive functions, showed an average improvement in test performance of 13.2% after 2 weeks’ intervention (p<0.001). Acute dosing effects (Pre- vs Post-acute assessments on days 4 and 17) were consistent: reaction time in the "peg and ball task" decreased by 7.9% (17’842±484 ms to 16’440±564 ms, p<0.001), while "serial subtraction totals scores” and “correct answers” increased by 7.3% (63.2±2.9 to 67.8± 3.0 points, p < 0.001) and 7.2% (58.7±2.9 to 62.9± 3.0 points**,** p<0.001), respectively.

Acute dosing was linked to temporary impairment of some memory tasks, including name-face recall (-11.9±1.1%, p=0.024), delayed recall (-15.4±1.5%, *p < 0.001*), picture recognition (-4.7±0.1%, *p < 0.001*), and word recognition (-3.4±0.1%, p=0.014). However, the 2 weeks intervention was linked with improved memory: immediate word recall accuracy increase (+22.3±1.7%, p<0.001) and delayed word recall (+21.5±2.1%, p<0.001). Attention, vigilance, spatial memory, and working memory tasks remained unaffected (Suppl. Tables S1B & S2B).

Mood assessments (using visual analogue mood scales (VAMS) alongside COMPASS battery testing) showed reduced stress (-17.3±6.6%, p=0.006), a modest increase in tranquility (+2.5±2.6%, p=0.016), with no changes in alertness or mental fatigue reduction after 14 days of intervention (Table S3B). Acute dosing (Suppl. Table S4B) reduced stress ratings equally (-16±5.2%, p=0.005) but increased mental fatigue (+16.0±4.3%, p<0.001) and reduced alertness (+8.6±3.7%, p=0.003). Tranquillity ratings were unchanged (Suppl. Tables S3B & S4B).

Table S4. Individual COMPASS task outcomes following chronic (14-days) intervention.

|  |  | **Baseline** | | | **Post-Chronic Dose1** | | |  | |  |  |  |  |
| --- | --- | --- | --- | --- | --- | --- | --- | --- | --- | --- | --- | --- | --- |
| **Task** | **category** | **mean** | **SD** | **SEM** | **mean** | **SD** | **SEM** | **%-change** | **P3** | **d** | |
| Serial Subtractions: correct numbers (n) | executive function, CDB | 27.5 | 9.8 | 1.4 | 31.2 | 11.2 | 1.6 | 13.2 | < 0.001 | -0.986 | |
| Serial Subtractions: total numbers (n) | executive function, CDB | 29.8 | 10.0 | 1.4 | 33.4 | 11.1 | 1.6 | 12.2 | < 0.001 | -0.949 | |
| Corsi Blocks (a.u.) | working memory, spatial memory | 6.1 | 1.2 | 0.2 | 6.0 | 0.9 | 0.1 | -1.8 | 0.151 | 0.213 | |
| Numeric Working Memory (%-accuracy) | working memory | 95.5 | 4.5 | 0.6 | 95.3 | 6.8 | 1.0 | -0.2 | 0.1932 |  | |
| Choice Reaction Time (msec) | Attention/vigilance | 505.6 | 76.2 | 10.8 | 502.0 | 71.4 | 10.1 | -0.7 | 0.509 | 0.097 | |
| RVIP (%-accuracy) | CDB, attention/vigilance | 54.9 | 25.3 | 3.6 | 57.1 | 26.6 | 3.8 | 4.1 | 0.157 | -0.207 | |
| Delayed word recognition (%-accuracy) | 2ndary memory, speed of memory | 77.3 | 9.0 | 1.3 | 78.3 | 9.0 | 1.3 | 1.4 | 0.196 | -0.191 | |
| Immediate recall (a.u.) | 2ndary memory, episodic memory | 5.0 | 2.1 | 0.3 | 6.1 | 2.1 | 0.3 | 22.3 | < 0.001 | -0.705 | |
| Delayed picture recognition (%-accuracy) | 2ndary memory, speed of memory, episodic memory | 89.6 | 8.6 | 1.2 | 87.4 | 11.6 | 1.6 | -2.5 | 0.175 | 0.201 | |
| Peg and Ball (a.u.) | excecutive function | 9604.3 | 2095.2 | 296.3 | 8237.9 | 1764.1 | 249.5 | -14.2 | < 0.001 | 0.947 | |
| Name to face recall (%-accuracy) | 2ndary memory | 40.3 | 19.2 | 2.7 | 36.7 | 19.6 | 2.8 | -9.1 | 0.102 | 0.243 | |
| Delayed recall: correct numbers (n) | 2ndary memory, episodic memory | 4.1 | 2.0 | 0.3 | 5.0 | 2.3 | 0.3 | 21.5 | 0.001 | -0.51 | |

1Task performance was compared as relative change between baseline assessment on visit 2 prior intervention (pre V2) and the true chronic assessment on visit 3 prior intervention (pre V3), 2*Wilcoxon signed rank test, 3student’s t-test*

Table S5. Individual COMPASS task outcomes following acute intervention (pre V2 & Pre V3 assessment vs , 1-hour post dose post V2 & V3 assessments).

|  |  | **Baseline1** | | | **Post-Dose1** | | |  |  |  |  |  |
| --- | --- | --- | --- | --- | --- | --- | --- | --- | --- | --- | --- | --- |
| **Task** | **category** | **mean** | **SD** | **SEM** | **mean** | **SD** | **SEM** | **%-change** | **P3** | **d** |
| Serial Subtractions: correct numbers (n) | executive function, CDB | 58.7 | 20.8 | 2.9 | 62.9 | 21.5 | 3.0 | 7.2 | <.001 | -0.926 |
| Serial Subtractions: total numbers (n) | executive function, CDB | 63.2 | 20.8 | 2.9 | 67.8 | 21.5 | 3.0 | 7.2 | <.001 | -1.169 |
| Corsi Blocks (a.u.) | working memory, spatial memory | 12.2 | 1.9 | 0.3 | 12.4 | 1.9 | 0.3 | 2.1 | 0.083 | -0.259 |
| Numeric Working Memory (%-accuracy) | working Memory | 190.7 | 9.0 | 1.3 | 193.0 | 6.9 | 1.0 | 1.2 | n.a2. | 0.637 |
| Choice Reaction Time (msec) | Attention/vigilance | 1007.7 | 138.4 | 19.6 | 1011.7 | 131.7 | 18.6 | 0.4 | 0.668 | -0.063 |
| RVIP (%-accuracy) | CDB, attention/vigilance | 112.0 | 50.8 | 7.2 | 110.4 | 50.4 | 7.1 | -1.4 | 0.408 | 0.122 |
| Delayed word recognition (%-accuracy) | 2ndary memory, speed of memory | 155.6 | 16.2 | 2.3 | 150.3 | 17.3 | 2.5 | -3.4 | 0.014 | 0.367 |
| Immediate recall (a.u.) | 2ndary memory, episodic memory | 11.2 | 3.7 | 0.5 | 10.7 | 3.6 | 0.5 | -3.9 | 0.25 | 0.17 |
| Delayed picture recognition (%-accuracy) | 2ndary memory, speed of memory, episodic memory | 177.0 | 18.7 | 2.7 | 168.7 | 22.4 | 3.2 | -4.7 | 0.001 | 0.513 |
| Peg and Ball (a.u.) | excecutive function | 17842.2 | 3424.1 | 484.2 | 16439.9 | 3986.1 | 563.7 | -7.9 | <.001 | 0.742 |
| Name to face recall (%-accuracy) | 2ndary memory | 77.0 | 33.7 | 4.8 | 67.8 | 34.4 | 4.9 | -11.9 | 0.024 | 0.343 |
| Delayed recall: correct numbers (n) | 2ndary memory, episodic memory | 9.1 | 3.8 | 0.5 | 7.7 | 3.9 | 0.6 | -15.2 | <.001 | 0.527 |

1Task performance was compared as relative change between cumulated baseline assessments on visits 2& 3 prior intervention (pre V2 & pre V3) and the post acute-dose assessment on visits 2&3 post intervention (post V2 & V3), 2*Wilcoxon signed rank test statistics not. available., 3student’s t-test*

Table S6. Individual visual analogue mood scale (VAMS) outcomes following chronic (14-days) intervention.

|  | Baseline | | | Post-Dose1 | | |  |  |  |  |  |
| --- | --- | --- | --- | --- | --- | --- | --- | --- | --- | --- | --- |
|  | mean | SD | SEM | mean | SD | SEM | %-change | p2 | d |
| VAMS stress (a.u.) | 33.03 | 16.93 | 2.39 | 27.32 | 15.12 | 2.14 | -17.3 | 0.006 | 0.425 |
| VAMS mental fatigue (a.u.) | 64.17 | 20.48 | 2.9 | 61.6 | 22.05 | 3.12 | -4.0 | 0.396 | 0.128 |
| VAMS tranquility (a.u.) | 80.45 | 12.99 | 1.84 | 82.45 | 14.74 | 2.08 | 2.5 | 0.016 | -0.37 |
| VAMS alertness (a.u.) | 65.8 | 18.49 | 2.61 | 70.05 | 20.1 | 2.84 | 6.5 | 0.053 | -0.293 |

1Task performance was compared as relative change between baseline assessment on visit 2 prior intervention (pre V2) and the true chronic assessment on visit 3 prior intervention (pre V3), *2student’s t-test*

Table S7. Individual visual analogue mood scale (VAMS) outcomes following acute intervention (1-hour post dose).

|  | Baseline1 | | | Post-Dose1 | | |  |  |  |
| --- | --- | --- | --- | --- | --- | --- | --- | --- | --- |
| Task | mean | SD | SEM | mean | SD | SEM | %-change | p2 | d |
| VAMS stress (a.u.) | 60.35 | 29.09 | 4.11 | 50.68 | 21.52 | 3.04 | -16.0 | 0.005 | 0.429 |
| VAMS mental fatigue (a.u.) | 125.77 | 37.12 | 5.25 | 145.88 | 37.94 | 5.37 | 16.0 | <.001 | -0.906 |
| VAMS tranquility (a.u.) | 162.9 | 24.52 | 3.47 | 167.51 | 17.72 | 2.51 | 2.8 | 0.098 | -0.246 |
| VAMS alertness (a.u.) | 135.85 | 34.56 | 4.89 | 124.26 | 35.54 | 5.03 | -8.5 | 0.003 | 0.446 |

1Task performance was compared as relative change between cumulated baseline assessments on visits 2& 3 prior intervention (pre V2 & pre V3) and the post acute-dose assessment on visits 2&3 post intervention (post V2 & V3), 2*student’s t-test*

SUPPLEMENTARY Section C

# Endocrinology

Biomarkers for chronic stress (CAR) and depression (evening cortisol) showed no significant overall changes, nor did evening melatonin levels, resp. melatonin/cortisol ratio (sleep readiness). However, subgroup analysis revealed significant differences in change scores (V2 vs. V3) between low- and high anxiety groups for melatonin and the melatonin/cortisol ratio (Supplementary Tables S1C-S3C). In the low trait anxiety subgroup, melatonin levels decreased from 13.09 ng/mL ± 8.53 to 9.34 ng/mL ± 5.77 (N=21, -3.75 ng/mL, -28.66%), while in the high trait anxiety subgroup, levels increased from 8.03 ng/mL ± 5.57 to 10.70 ng/mL ± 7.81 (N=21, +2.67 ng/mL, 33.25%, p=0.03). Similarly, the melatonin/cortisol ratio dropped in the low-anxiety subgroup from 2.68 ± 2.13 to 1.87 ± 1.23 (N=23, outlier-corrected: -0.81 units, -30.22%) but increased in the high-anxiety subgroup from 1.18 ± 0.99 to 1.75 ± 1.84 (N=22, outlier-corrected: +0.57 units, +48.31%, p=0.019)

Table S8: Endocrinological parameters – absolute change from V2 to V3 with regard to trait anxiety subgroups

|  |  | AUCg | AUCi | Cortisol Increase | Cortisol percent Increase | evening Cortisol | Melatonin | Ratio: Melatonin / Cortisol. |
| --- | --- | --- | --- | --- | --- | --- | --- | --- |
| low anxiety | |  |  |  |  |  |  |  |
| Mean |  | -62.41 | -74.69 | -2.68 | -8.96 | 1.81 | -3.48 | -1.50 |
| SD |  | 467.62 | 393.29 | 13.76 | 86.19 | 8.56 | 8.42 | 3.85 |
| SEM |  | 95.45 | 80.28 | 2.75 | 17.24 | 1.75 | 1.72 | 0.80 |
| 95% CI | LB | -276.16 | -271.89 | -9.86 | -55.60 | -1.97 | -5.69 | -1.71 |
|  | UB | 157.60 | 82.17 | 2.72 | 19.93 | 5.95 | 0.77 | 0.09 |
| N |  | 24 | 24 | 25 | 25 | 24 | 24 | 23 |
| high anxiety | |  |  |  |  |  |  |  |
| Mean |  | -13.66 | -55.80 | -1.60 | 14.03 | -0.95 | 2.82 | 1.02 |
| SD |  | 441.29 | 231.69 | 9.00 | 156.65 | 3.74 | 6.28 | 2.19 |
| SEM |  | 90.08 | 47.29 | 1.80 | 31.33 | 0.76 | 1.31 | 0.47 |
| 95% CI | LB | -202.94 | -140.30 | -4.97 | -59.42 | -2.93 | -0.60 | 0.06 |
|  | UB | 200.55 | 52.92 | 2.43 | 94.42 | 0.57 | 4.93 | 2.09 |
| N |  | 24 | 24 | 25 | 25 | 24 | 23 | 22 |

*SD = standard deviation, SEM= standard error of mean, 95% CI LB & UB = 95% confidence interval, lower bound and upper bound, N = sample size*

Table S9: Endocrinological parameters – Percent change from V2 to V3 with regard to trait anxiety subgroups

|  |  | AUCg | AUCi | Cortisol increase | Cortisol perc. Increase | evening Cortisol | Melatonin | Ratio: Melatonin. / Cortisol |
| --- | --- | --- | --- | --- | --- | --- | --- | --- |
| low anxiety | |  |  |  |  |  |  |  |
| Mean |  | 0.44 | -55.84 | 42.09 | 102.93 | 43.18 | -1.32 | -3.41 |
| SD |  | 34.80 | 350.13 | 308.65 | 448.27 | 142.87 | 86.23 | 89.15 |
| SEM |  | 7.10 | 71.47 | 61.73 | 89.65 | 29.16 | 17.98 | 19.01 |
| 95% CI | LB | -16.03 | -104.31 | -90.18 | -94.19 | -23.72 | -35.48 | -39.98 |
|  | UB | 17.86 | 112.99 | 74.22 | 142.95 | 115.02 | 44.50 | 41.28 |
| N |  | 24 | 24 | 25 | 25 | 24 | 23 | 22 |
| high anxiety | |  |  |  |  |  |  |  |
| Mean |  | 5.68 | 6.02 | 9.95 | 37.63 | 1.49 | 88.33 | 79.70 |
| SD |  | 46.07 | 108.07 | 82.00 | 179.19 | 47.70 | 269.83 | 194.93 |
| SEM |  | 9.41 | 22.06 | 16.40 | 35.84 | 9.74 | 58.88 | 43.59 |
| 95% CI | LB | -17.78 | -42.28 | -28.55 | -40.40 | -22.98 | -54.12 | -11.53 |
|  | UB | 13.72 | 71.76 | 54.34 | 151.58 | 17.69 | 219.17 | 180.38 |
| N |  | 24 | 24 | 25 | 25 | 24 | 21 | 20 |

*SD = standard deviation, SEM= standard error of mean, 95% CI LB & UB = 95% confidence interval, lower bound and upper bound, N = sample size*

Table S10: summary of subgroup analyses for cortisol and melatonin data

|  | **subgroup: trait anxiety** | | | | |
| --- | --- | --- | --- | --- | --- |
|  | F | df | error df | p | partial 2 |
| Cortisol |  |  |  |  |  |
| AUCg | 0.036 | 1 | 42 | 0.825 | 0.001 |
|  | difference values: | | |  |  |
|  | Z |  |  | p |  |
| AUCi | -0.66 |  |  | 0.509 |  |
| Increase | -0.15 |  |  | 0.884 |  |
| Percent increase | -0.90 |  |  | 0.368 |  |
| Evening cortisol | -0.44 |  |  | 0.657 |  |
| Melatonin |  |  |  |  |  |
| Melatonin | **-2.17** |  |  | **0.030** |  |
| Ration: Cortisol / Melatonin | **-2.34** |  |  | **0.019** |  |
